# Supplementary material for: Supervised Learning for Detection of Duplicates in Genomic Sequence Databases
Source: PubMed Central journal article supplement (PMC4973881; doi:10.1371/journal.pone.0159644), 2016-08-04
Supplement: pone.0159644.s004.pdf [file pone.0159644.s004.pdf]

**Table 1. Performance of binary classification on *Mus musculus* (AUROC=area under the receiver operator characteristic curve).**

| Organism             | Precision    |              | Recall       |              | AUROC        |              | Accuracy     |
|----------------------|--------------|--------------|--------------|--------------|--------------|--------------|--------------|
|                      | DU           | DI           | DU           | DI           | DU           | DI           |              |
| Mus musculus         |              |              |              |              |              |              |              |
| <i>Seq90</i>         | 0.898        | 0.589        | 0.313        | 0.965        | 0.639        | 0.639        | 0.642        |
| <i>Naïve Bayes</i>   | 0.984        | 0.859        | 0.836        | 0.987        | 0.951        | 0.951        | 0.912        |
| <i>Decision tree</i> | <b>0.987</b> | <b>0.962</b> | <b>0.960</b> | <b>0.988</b> | <b>0.987</b> | <b>0.987</b> | <b>0.974</b> |
| <i>SVM</i>           | 0.957        | 0.949        | 0.948        | 0.959        | 0.953        | 0.953        | 0.953        |

DU: duplicate pairs; DI: distinct pairs; Accuracy is for all the instances.
