# Supplementary material for: Supervised Learning for Detection of Duplicates in Genomic Sequence Databases
Source: PubMed Central journal article supplement (PMC4973881; doi:10.1371/journal.pone.0159644), 2016-08-04
Supplement: pone.0159644.s005.pdf [file pone.0159644.s005.pdf]

**Table 1. Error analysis: average feature similarity for error cases on decision trees.**

| Feature      | Caenorhabditis |       | Danio rerio |       | Drosophila |       | Escherichia coli |       | Zea mays |       |
|--------------|----------------|-------|-------------|-------|------------|-------|------------------|-------|----------|-------|
|              | FP             | FN    | FP          | FN    | FP         | FN    | FP               | FN    | FP       | FN    |
| #Instances   | 98             | 47    | 215         | 126   | 532        | 212   | 14               | 21    | 20       | 17    |
| Description  | 0.393          | 0.480 | 0.095       | 0.134 | 0.271      | 0.566 | 0.219            | 0.100 | 0.353    | 0.341 |
| Literature   | 0.230          | 0.312 | 0.033       | 0.143 | 0.012      | 0.378 | 0.000            | 0.000 | 0.123    | 0.078 |
| Length       | 0.306          | 0.497 | 0.094       | 0.091 | 0.390      | 0.714 | 0.471            | 0.317 | 0.449    | 0.467 |
| Identity     | 0.863          | 0.897 | 0.912       | 0.978 | 0.910      | 0.934 | 0.938            | 0.981 | 0.918    | 0.960 |
| AP           | 0.002          | 0.014 | 0.002       | 0.004 | 0.012      | 0.360 | 0.012            | 0.077 | 0.051    | 0.323 |
| Expect_Value | 0.174          | 0.000 | 0.124       | 0.001 | 0.390      | 0.224 | 0.354            | 0.000 | 0.616    | 0.001 |
| CDS_Identity | 0.930          | 0.878 | 0.921       | 0.840 | 0.902      | 0.926 | 0.941            | 0.978 | 0.911    | 0.952 |
| CDS_AP       | 0.010          | 0.014 | 0.010       | 0.080 | 0.017      | 0.412 | 0.031            | 0.014 | 0.069    | 0.404 |
| CDS_Expect   | 0.411          | 0.168 | 0.478       | 0.290 | 0.533      | 0.266 | 0.640            | 0.886 | 0.406    | 0.140 |
| TRS_Identity | 0.413          | 0.878 | 0.403       | 0.480 | 0.432      | 0.729 | 0.580            | 0.330 | 0.552    | 0.848 |
| TRS_AP       | 0.020          | 0.062 | 0.020       | 0.097 | 0.027      | 0.494 | 0.039            | 0.022 | 0.113    | 0.512 |
| TRS_Expect   | 1.322          | 2.528 | 1.522       | 0.767 | 1.807      | 0.938 | 0.921            | 1.623 | 3.056    | 0.044 |

#Instances: number of instances; FP: false positives, distinct pairs classified as duplicates; FN: false negatives, duplicates classified as distinct pairs; Numbers are averages, excluding pairs not have specific features.
