# Supplementary material for: Supervised Learning for Detection of Duplicates in Genomic Sequence Databases
Source: PubMed Central journal article supplement (PMC4973881; doi:10.1371/journal.pone.0159644), 2016-08-04
Supplement: pone.0159644.s006.pdf [file pone.0159644.s006.pdf]

**Table 1. Binary vs Multiple in finding different duplicate types.**

| Organism                | EF                  | ES          | NS                  |
|-------------------------|---------------------|-------------|---------------------|
| Caenorhabditis elegans  |                     |             |                     |
| <i>Naïve Bayes</i>      | 0.485, <b>0.578</b> | 1.000,1.000 | 0.613, <b>0.671</b> |
| <i>Decision tree</i>    | 0.985,0.980         | 1.000,1.000 | 0.658,0.626         |
| <i>SVM</i>              | 0.908, <b>0.932</b> | 1.000,1.000 | 0.600,0.568         |
| Danio rerio             |                     |             |                     |
| <i>Naïve Bayes</i>      | 0.479, <b>0.508</b> | 1.000,1.000 | 0.146, <b>0.292</b> |
| <i>Decision tree</i>    | 0.958, <b>0.959</b> | 1.000,1.000 | 0.483,0.326         |
| <i>SVM</i>              | 0.988, <b>0.989</b> | 1.000,1.000 | 0.146,0.011         |
| Drosophila melanogaster |                     |             |                     |
| <i>Naïve Bayes</i>      | 0.904, <b>0.909</b> | 1.000,1.000 | 0.980, <b>0.985</b> |
| <i>Decision tree</i>    | 0.999,0.998         | 1.000,1.000 | 0.997,0.996         |
| <i>SVM</i>              | 0.990,0.990         | 1.000,1.000 | 0.986,0.986         |
| Escherichia coli        |                     |             |                     |
| <i>Naïve Bayes</i>      | 0.829, <b>0.916</b> | 1.000,1.000 | 0.118, <b>0.235</b> |
| <i>Decision tree</i>    | 1.000,0.998         | 1.000,1.000 | 0.176,0.000         |
| <i>SVM</i>              | 1.000,1.000         | 1.000,1.000 | 0.000,0.000         |
| Zea mays                |                     |             |                     |
| <i>Naïve Bayes</i>      | 0.969, <b>0.980</b> | 1.000,1.000 | 0.136, <b>0.712</b> |
| <i>Decision tree</i>    | 1.000,0.999         | 1.000,1.000 | 0.712,0.627         |
| <i>SVM</i>              | 0.995, <b>0.996</b> | 1.000,1.000 | 0.237,0.017         |

EF, ES and NS are duplicate categories in Table ??; For each type, the first is for binary and the second is for multi-class.
