# Supplementary material for: Supervised Learning for Detection of Duplicates in Genomic Sequence Databases
Source: PubMed Central journal article supplement (PMC4973881; doi:10.1371/journal.pone.0159644), 2016-08-04
Supplement: pone.0159644.s007.pdf [file pone.0159644.s007.pdf]

**Table 1. Generalisation results of binary classifier.**

| <b>Organism</b>         | Cae   | Dan   | Dro   | Esc   | Zea   |
|-------------------------|-------|-------|-------|-------|-------|
| Caenorhabditis elegans  |       |       |       |       |       |
| <i>Decision tree</i>    | –     | 0.847 | 0.610 | 0.976 | 0.692 |
| <i>SVM</i>              | –     | 0.783 | 0.384 | 0.971 | 0.505 |
| Danio rerio             |       |       |       |       |       |
| <i>Decision tree</i>    | 0.867 | –     | 0.841 | 0.780 | 0.982 |
| <i>SVM</i>              | 0.829 | –     | 0.714 | 0.917 | 0.643 |
| Drosophila melanogaster |       |       |       |       |       |
| <i>Decision tree</i>    | 0.733 | 0.852 | –     | 0.935 | 0.994 |
| <i>SVM</i>              | 0.711 | 0.848 | –     | 0.852 | 0.988 |
| Escherichia coli        |       |       |       |       |       |
| <i>Decision tree</i>    | 0.845 | 0.764 | 0.986 | –     | 0.984 |
| <i>SVM</i>              | 0.853 | 0.719 | 0.833 | –     | 0.966 |
| Zea mays                |       |       |       |       |       |
| <i>Decision tree</i>    | 0.818 | 0.873 | 0.861 | 0.967 | –     |
| <i>SVM</i>              | 0.897 | 0.701 | 0.849 | 0.894 | –     |

EF: close to or exact fragments; ES: close to or exact sequences; NS: non-significant alignments; DI refers to distinct pairs.
