# Supplementary material for: Supervised Learning for Detection of Duplicates in Genomic Sequence Databases
Source: PubMed Central journal article supplement (PMC4973881; doi:10.1371/journal.pone.0159644), 2016-08-04
Supplement: pone.0159644.s008.pdf [file pone.0159644.s008.pdf]

**Table 1. Generalisation results of multi-class classifier.**

| <b>Organism</b>         | Cae   | Dan   | Dro   | Esc   | Zea   |
|-------------------------|-------|-------|-------|-------|-------|
| Caenorhabditis elegans  |       |       |       |       |       |
| <i>Decision tree</i>    | –     | 0.827 | 0.708 | 0.976 | 0.821 |
| <i>SVM</i>              | –     | 0.800 | 0.436 | 0.946 | 0.433 |
| Danio rerio             |       |       |       |       |       |
| <i>Decision tree</i>    | 0.903 | –     | 0.833 | 0.907 | 0.988 |
| <i>SVM</i>              | 0.837 | –     | 0.725 | 0.963 | 0.668 |
| Drosophila melanogaster |       |       |       |       |       |
| <i>Decision tree</i>    | 0.822 | 0.764 | –     | 0.962 | 0.994 |
| <i>SVM</i>              | 0.711 | 0.741 | –     | 0.915 | 0.954 |
| Escherichia coli        |       |       |       |       |       |
| <i>Decision tree</i>    | 0.804 | 0.763 | 0.955 | –     | 0.984 |
| <i>SVM</i>              | 0.830 | 0.656 | 0.823 | –     | 0.909 |
| Zea mays                |       |       |       |       |       |
| <i>Decision tree</i>    | 0.792 | 0.861 | 0.861 | 0.957 | –     |
| <i>SVM</i>              | 0.863 | 0.741 | 0.842 | 0.895 | –     |

EF: close to or exact fragments; ES: close to or exact sequences; NS: non-significant alignments; DI refers to distinct pairs.
